# Supplementary material for: Exploring the Potential to Repurpose Flexible Moulded Polyurethane Foams as Acoustic Insulators
Source: MDPI journal article supplement (doi:10.3390/polym14010163), 2021-12-31
Supplement: s1 [file s1]

Article

# Exploring the Potential to Repurpose Flexible Moulded Polyurethane Foams as Acoustic Insulators

Enikő Mester<sup>1,2</sup>, Dániel Pecsmány<sup>1,2</sup>, Károly Jálics<sup>3</sup>, Ádám Filep<sup>2,4</sup>, Miklós Varga<sup>1,2</sup>, Kitti Grácz<sup>1,2</sup>, Béla Viskolcz<sup>1,2</sup>, Béla Fiser<sup>1,2,5,\*</sup>

<sup>1</sup> Institute of Chemistry, University of Miskolc, 3515 Miskolc-Egyetemváros, Hungary

<sup>2</sup> Higher Education and Industrial Cooperation Centre, University of Miskolc, 3515 Miskolc-Egyetemváros, Hungary

<sup>3</sup> Department of Machine Elements, University of Miskolc, 3515 Miskolc-Egyetemváros, Hungary

<sup>4</sup> Institute of Physical Metallurgy and Metal Forming, University of Miskolc, 3515 Miskolc-Egyetemváros, Hungary,

<sup>5</sup> Ferenc Rákóczi II. Transcarpathian Hungarian College of Higher Education, 90200 Beregszász, Transcarpathia, Ukraine,

\* Correspondence: kemfiser@uni-miskolc.hu

## Supplementary information

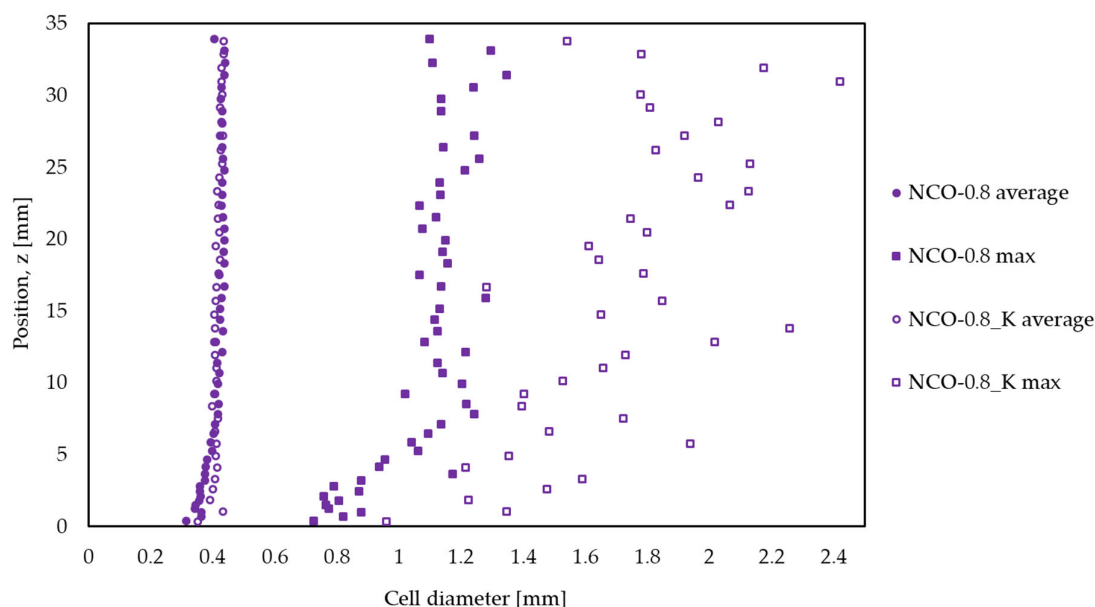

**Figure S1** Average and maximum cell diameters along the sample height of the NCO-0.8 sample examined with a micro-CT before (NCO-0.8, filled circles and squares) and after (NCO-0.8\_K, empty circles and squares) dry heat aging.

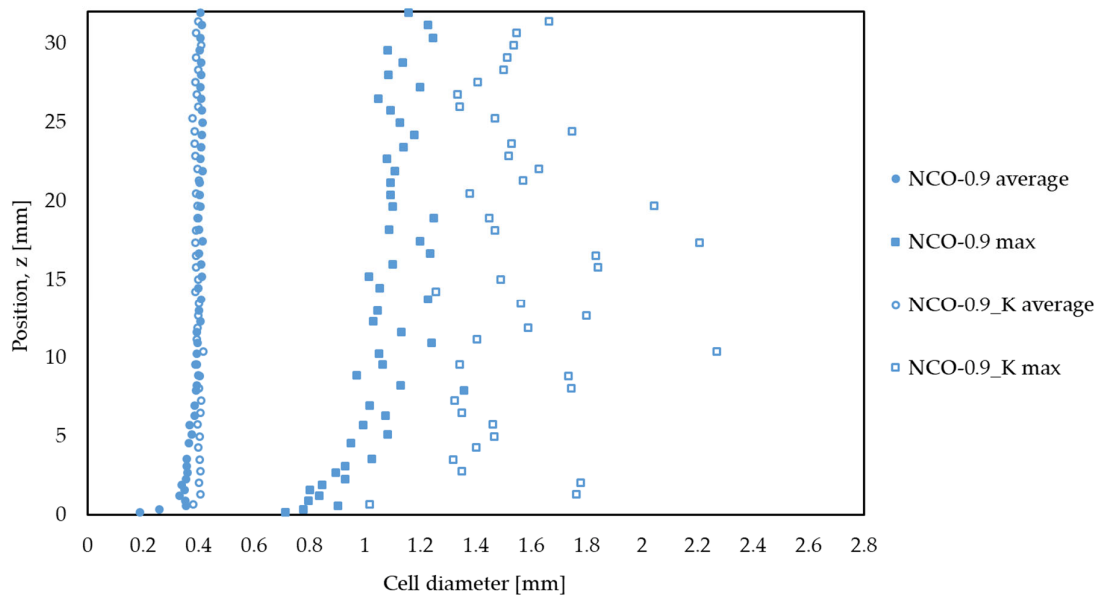

**Figure S2** Average and maximum cell diameters along the sample height of the NCO-0.9 sample examined with a micro-CT before (NCO-0.9, filled circles and squares) and after (NCO-0.9\_K, empty circles and squares) dry heat aging.

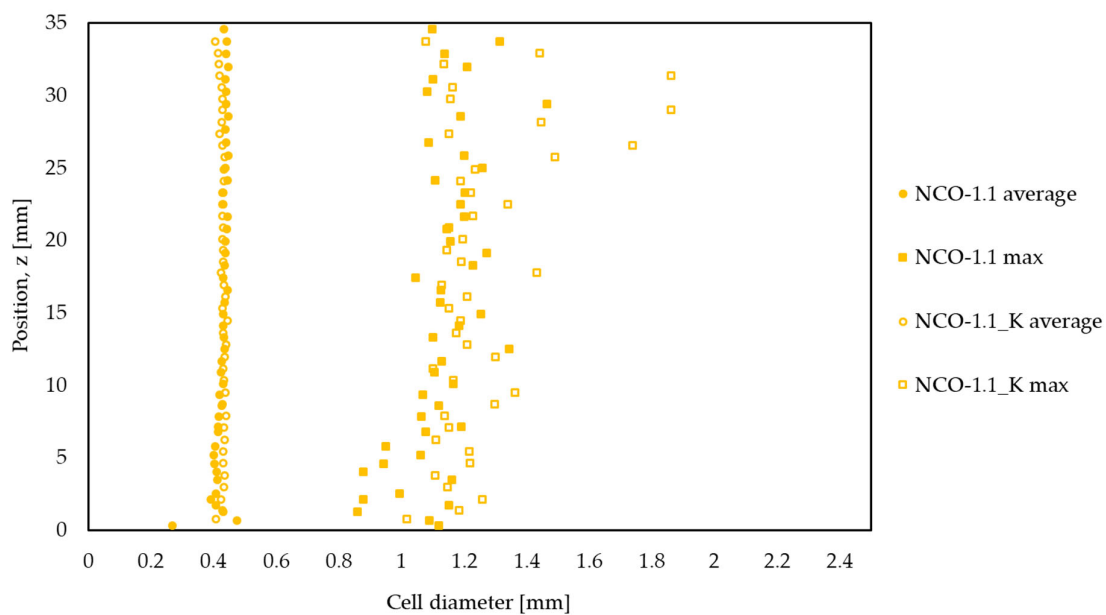

**Figure S3** Average and maximum cell diameters along the sample height of the NCO-1.1 sample examined with a micro-CT before (NCO-1.1, filled circles and squares) and after (NCO-1.1\_K, empty circles and squares) dry heat aging.

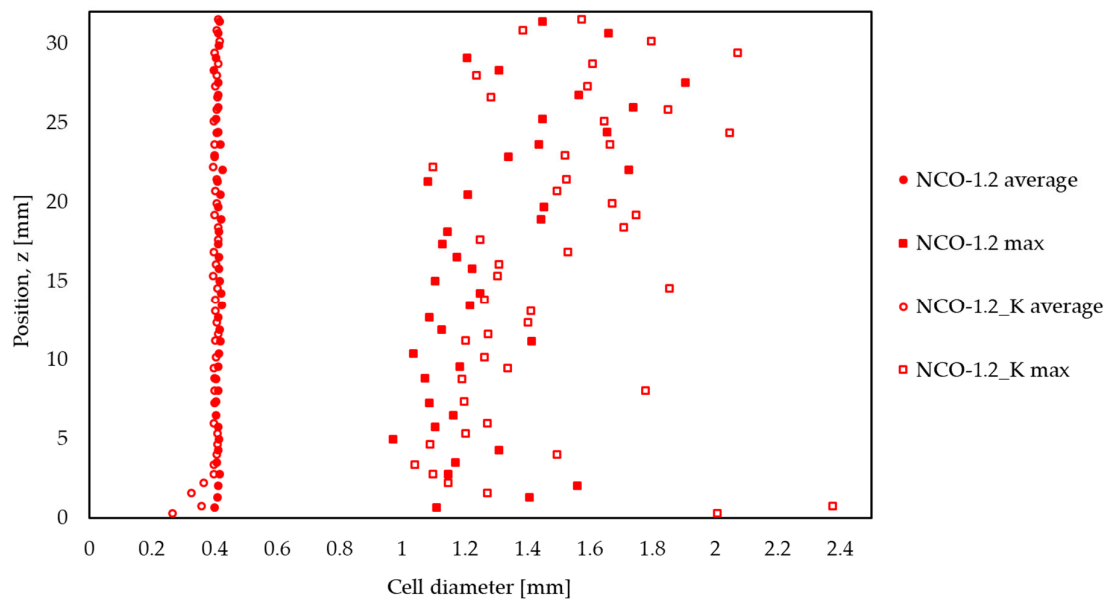

**Figure S4** Average and maximum cell diameters along the sample height of the NCO-1.2 sample examined with a micro-CT before (NCO-1.2, filled circles and squares) and after (NCO-1.2\_K, empty circles and squares) dry heat aging.
